# Supplementary material for: Arabidopsis ADF5 promotes stomatal closure by regulating actin cytoskeleton remodeling in response to ABA and drought stress
Source: PubMed Central journal article supplement (PMC6322581; doi:10.1093/jxb/ery385), 2018-11-24
Supplement: ery385_suppl_supplementary-fig-s1.pdf [file ery385_suppl_supplementary-fig-s1.pdf]

**Table S1. Primer information used in this study**

| Primer name | Sequence (5'-3')                                          |
|-------------|-----------------------------------------------------------|
| DPBF3-F     | GGGGACAAGTTTGTACAAAAAAGCAGGCTTCATGG<br>ATTCTCAGAGGGGTATTG |
| DPBF3-R     | GGGGACCACTTTGTACAAGAAAGCTGGGTTCGAAAG<br>GAGCCGAGCTTGTCCGT |
| ADF5p1-F    | AAGCTTATGACTTTAAGTGCTTTAT                                 |
| ADF5p1-R    | GGTACCTCTATATTTTTTTTTTTTCAA                               |
| ADF5p2-F    | AAGCTTTTTGATTAAATTTATTT                                   |
| ADF5p2-R    | GGTACCTACAAAGTGAGCAACTTCAC                                |
| ADF5P-331-F | GGGGACAAGTTTGTACAAAAAAGCAGGCTTCTGCCG<br>ACGAGAAAAAGAAC    |
| ADF5P-331-R | GGGGACCACTTTGTACAAGAAAGCTGGGTCCCTGCGAA<br>TCATCATTAGCTA   |
| DPBF3-Y-F   | GGATCCATGGATTCTCAGAGGGGTAT                                |
| DPBF3-Y-R   | CTCGAGGAAAGGAGCCGAGCTTGTC                                 |
| ADF5-F      | GGGGACAAGTTTGTACAAAAAAGCAGGCTTCATGGC<br>GATGGCTTTCAAG     |
| ADF5-R      | GGGGACCACTTTGTACAAGAAAGCTGGGTCTTTGGCA<br>CGGTCTTGAT       |
| ABF1-F      | GGGGACAAGTTTGTACAAAAAAGCAGGCTTCATGGG<br>TACTCACATTGATATC  |
| ABF1-R      | GGGGACCACTTTGTACAAGAAAGCTGGGTCCCTTCTT<br>ACCACGGACCGGTA   |
| ABF2-F      | GGGGACAAGTTTGTACAAAAAAGCAGGCTTCATGGA<br>TGGTAGTATGAATTTG  |
| ABF2-R      | GGGGACCACTTTGTACAAGAAAGCTGGGTCCCAAGG<br>TCCCGACTCTGTCCT   |
| ABF3-F      | GGGGACAAGTTTGTACAAAAAAGCAGGCTTCATGG<br>ATTCTCAGAGGGGTATTG |
| ABF3-R      | AAGAAAGCTGGGTCCCAGGGACCCGTCATGTCCTT                       |
| ABF4-F      | GGGGACAAGTTTGTACAAAAAAGCAGGCTTCATGGG<br>AACTCACATCAATTC   |
| ABF4-R      | GGGGACCACTTTGTACAAGAAAGCTGGGTCCCATGG<br>TCCGGTTAATGTCCTT  |

|                  |                                                          |
|------------------|----------------------------------------------------------|
| DPBF4-F          | GGGGACAAGTTTGTACAAAAAAGCAGGCTTCATGG<br>GTTCTATTAGAGGAAAC |
| DPBF4-R          | GGGGACCACTTTGTACAAGAAAGCTGGGTTCGAGAG<br>AAGCAGAGTTTGTTC  |
| ADF5-Chip-11-F   | TTAAAGATTCTTGATCTGAT                                     |
| ADF5-Chip-11-R   | CTGCGAATCATCATTAGCTAT                                    |
| ADF5-Chip-12-F   | CTTTGTAACCCTTTAGCAGCAA                                   |
| ADF5-Chip-12-R   | CTTTAAACGTAGAAAAACAAAT                                   |
| ADF5-Chip-21-F   | ATGCCGACGAGAAAAAGC                                       |
| ADF5-Chip-21-R   | AAATGCGATCACTATTTACTC                                    |
| ADF5-Chip-22-F   | GCAAATAAATCGTTAGATATT                                    |
| ADF5-Chip-22-R   | ATTAACGCACCGTGTGTTCTG                                    |
| <i>adf5</i> -LP  | AAATGCTTAAACACGACACGG                                    |
| <i>adf5</i> -RP  | GCTACGCTGTCTTTGATTTCG                                    |
| <i>dpbf3</i> -LP | TCTTCTTTGATGGGTGGTTTG                                    |
| <i>dpbf3</i> -RP | CAAGCTTGGCTATTGCAGAAC                                    |
| <i>dpbf4</i> -LP | TCCACTTAGGATCTGGTGGTG                                    |
| <i>dpbf4</i> -RP | ATACTGCATGCAAATTCCTG                                     |
| LBb1.3           | ATTTTGCCGATTCGGAAC                                       |
| ADF5-qRT-F       | CGTTTGTGTTTTGATTGTGTTGTAA                                |
| ADF5-qRT-R       | CCGTTACTCGTAGGACAAATTCG                                  |
| DPBF3-qRT-F      | GAGAGTCTGCTGCTCGTTCCCG                                   |
| DPBF3-qRT-R      | TTCCACCTCCTTTTGCTTCCTG                                   |
| DPBF4-qRT-F      | ATAATCCACCCATCATCACCAT                                   |
| DPBF4-qRT-R      | TCATCAGCCTCAACAACAACAA                                   |
| UBQ11-qRT-F      | CACACTCCACTTGGTCTTGCGT                                   |
| UBQ11-qRT-R      | TGGTCTTTCCGGTGAGACTCTTCA                                 |
| RD29A-qRT-F      | GTTACTGATCCCACCAAAGAAGA                                  |
| RD29A-qRT-R      | GGAGACTCATCAGTCACTTCCA                                   |
