# Supplementary material for: Arabidopsis ADF5 promotes stomatal closure by regulating actin cytoskeleton remodeling in response to ABA and drought stress
Source: PubMed Central journal article supplement (PMC6322581; doi:10.1093/jxb/ery385), 2018-11-24
Supplement: ery385_suppl_supplementary-fig-s2.pdf [file ery385_suppl_supplementary-fig-s2.pdf]

Fig. S1

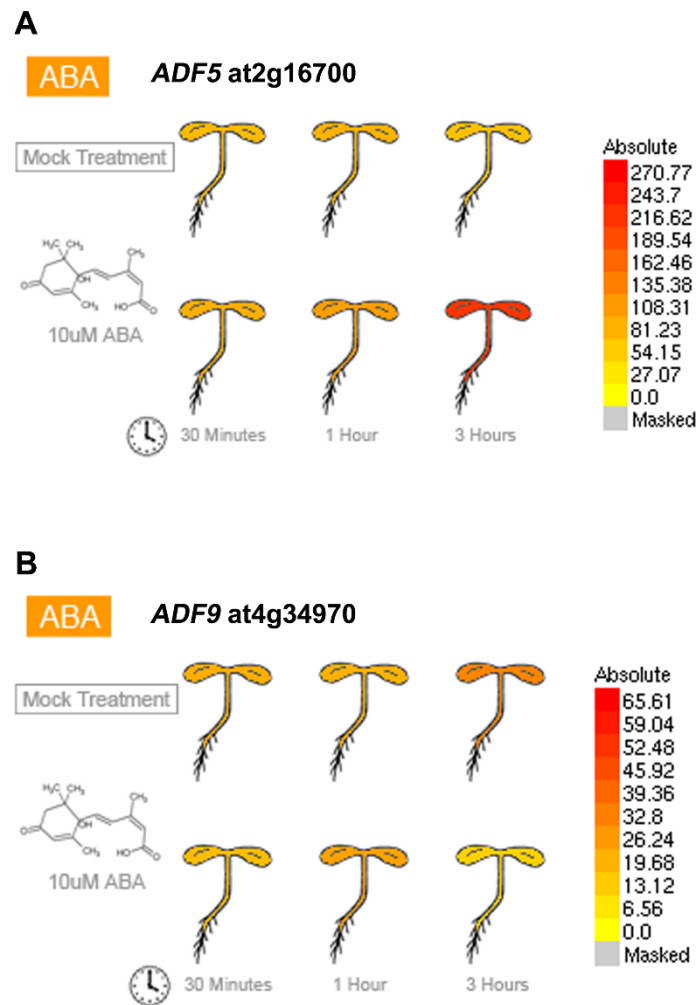

Fig. S1. *ADF5* expression is induced by ABA from microarray analysis.

(A) The expression level of *ADF5* is upregulated by ABA from the e-FP browser (<http://bbc.botany.utoronto.ca/efp/cgi-bin/efp>). Red indicates high expression, and blue scale denotes low expression. (B) The expression levels of *ADF9* after ABA treatment from the e-FP browser (<http://bbc.botany.utoronto.ca/efp/cgi-bin/efp>). Red indicates high expression, and blue scale denotes low expression.

Fig. S2

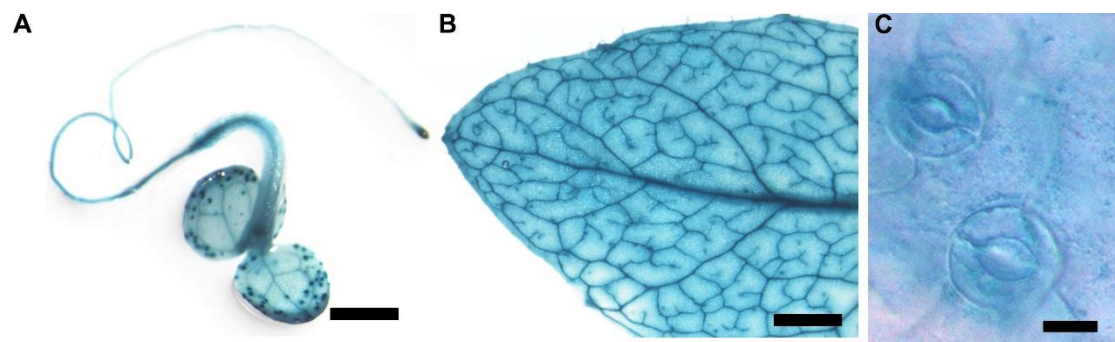

Fig. S2. Analysis of ADF5 expression patterns.

The GUS activity in the PBI121-ADF5Pro-GUS transgenic plants in cotyledon (A), rosette leaf (B) and guard cells (C).

Fig. S3

**A** *ADF5* at2g16700

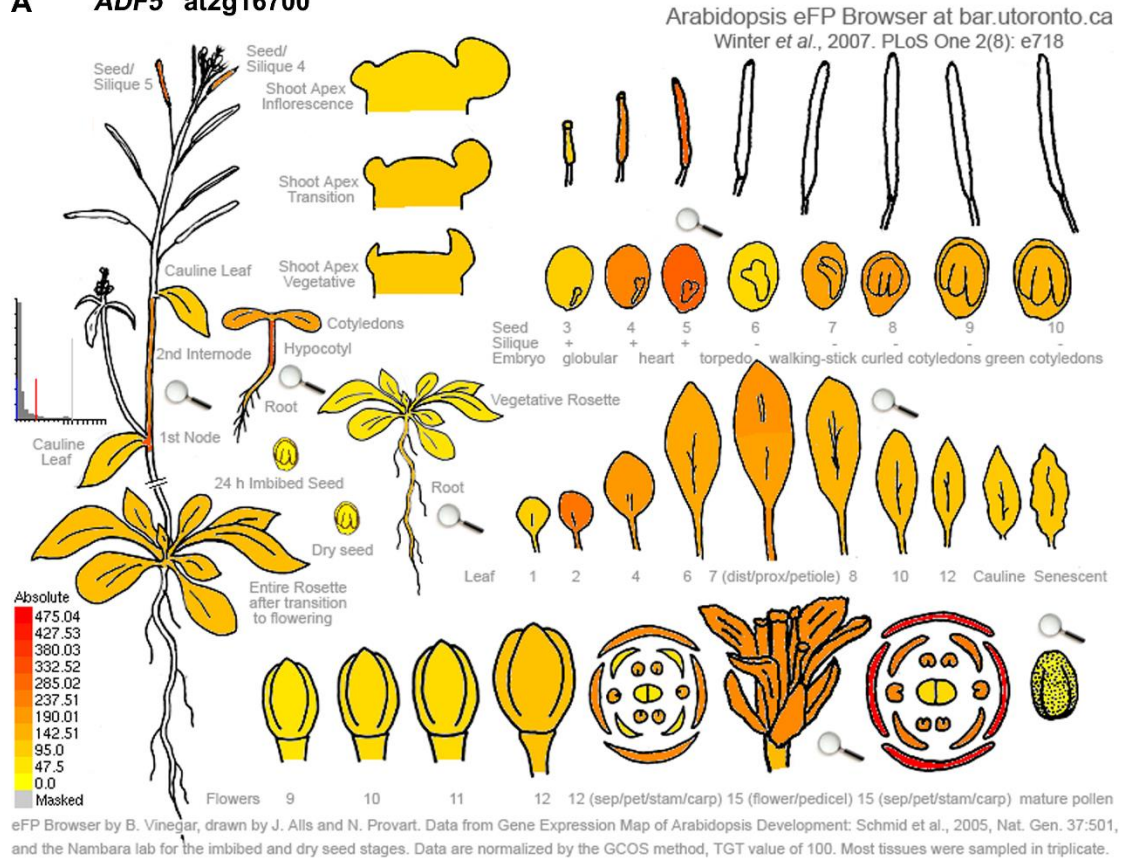

**B** *ADF5* at2g16700

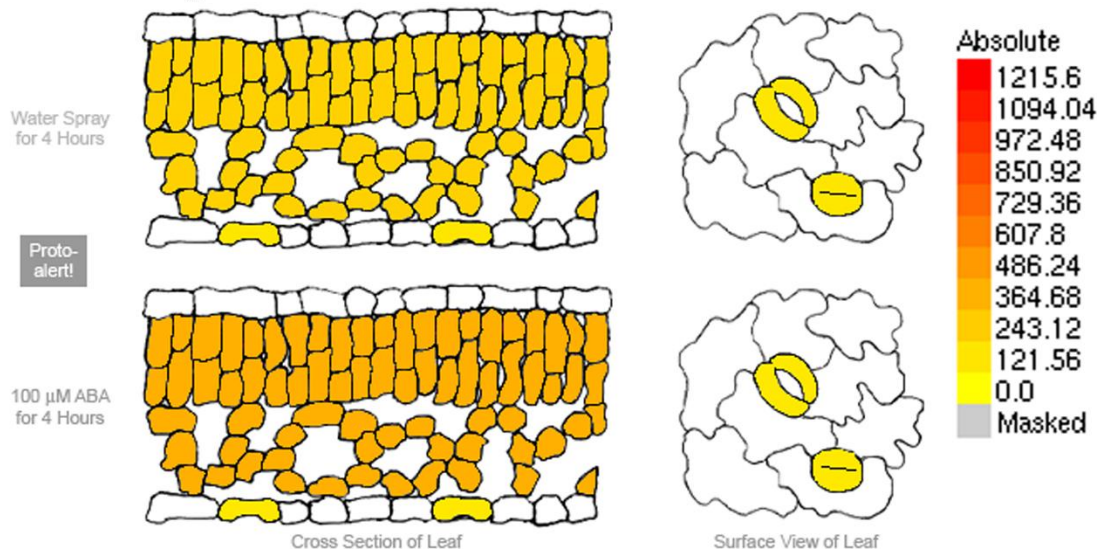

Fig. S3. *ADF5* expression in leaves and guard cells.

(A) and (B) The expression level of *ADF5* in leaves and guard cells from the e-FP browser (<http://bbc.botany.utoronto.ca/efp/cgi-bin/efp>). Red indicates high expression, and blue denotes low expression.

Fig. S4

aaaatatataaaaaaaaaattattagatatttatcagaaaaagacaagatttattag**tc**cagaaca 66  
**ca**cgg**tg**ac**gt**taata**tg**cc**ga**cgagaaaaagaacaaaaatatt**cg**tcttaacaaaaagttt 132  
acaaggg**tg**agttt**gt**aataagagtaa**at**ag**tg**at**cg**ca**tt**gtata**gg**cataacttttatataaa 198  
gacctaaag**tct**taccatt**tg**aacagaaaaag**ct**ctcc**ac**gc**ct**aaaaaaaaagaaaaaa 264  
gagacagaagaagaaaaagataaagaagaatcaaacttt**gt**aacc**tt**ag**ca**g**ca**ATGG 330  
CGATGGCTTTCAAGATG**gt**aaattcaaatt**gt**ttt**ct**ac**gt**ttaaagatt**ct**tgat**ct**gat 396  
ctttaaaca**aat**ag**ct**aatgatgatt**cg**cag 427

Fig. S4. The prediction of ABRE core motif and GCEs in the *ADF5* promoter.

The prediction of ABRE core motif and GCEs in the *ADF5* promoter.

Fig. 5

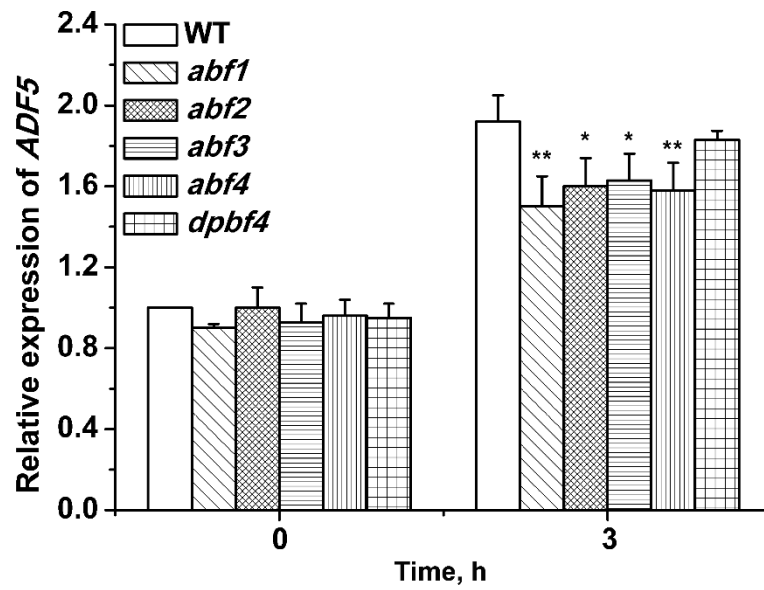

Fig. S5. Expression of *ADF5* in WT and *abf/areb* mutant plants.

qRT-PCR analysis revealed *ADF5* expression by ABA. Fourteen-day-old seedlings were treated with 40  $\mu$ M ABA for different times, and the leaves of seedling were detached for RNA extraction. *UBQ11* was used as an internal gene.

Fig. S6

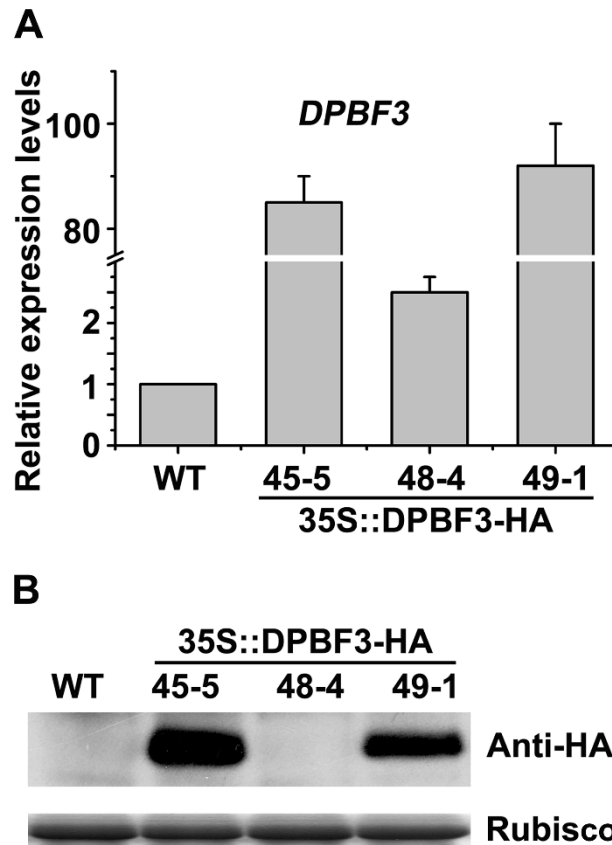

Fig. S6. Identification of the DPBF3 overexpression transgenic lines.

(A) qRT-PCR analysis of *DPBF3* expression in 35S:DPBF3-HA overexpression plants.

(B) Immunoblot analysis of DPBF3 by HA monoclonal antibody in WT and 35S:DPBF3-HA overexpression plants. Rubisco stained by Coomassie brilliant blue was used as an internal loading control.

Fig. S7

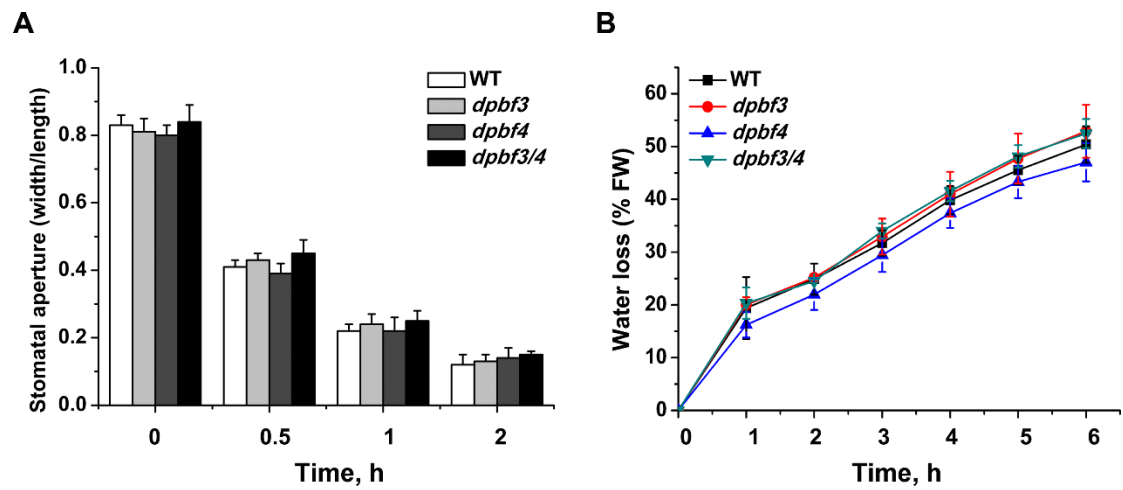

Fig. S7. Phenotypic comparison of stomatal closure and water loss among WT, *dpbf3*, *dpbf4* and *dpbf3/4* plants.

(A) The phenotype comparison of the stomatal closing rate of WT, *dpbf3*, *dpbf4* and *dpbf3/4* plants induced by ABA. (B) Analysis of water loss from the detached leaves of WT, *dpbf3*, *dpbf4* and *dpbf3/4* plants. The data represent the mean  $\pm$  SE based on three independent biological replicates.

Fig. S8

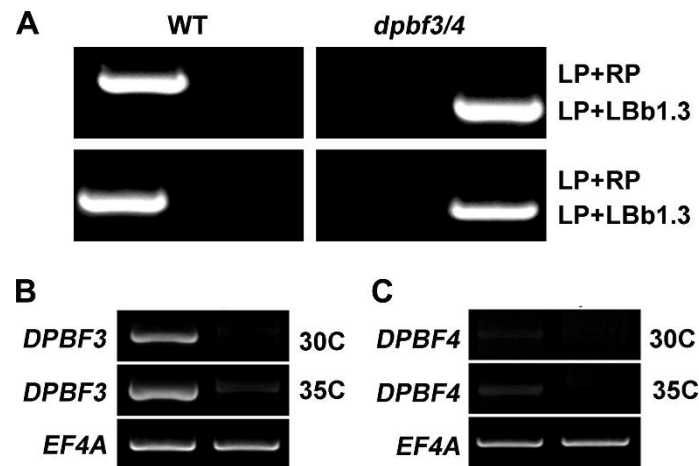

Fig. S8. Identification of the T-DNA insertion in the *dpbf3/4* homozygous mutants.

(A) *dpbf3/4* homozygous T-DNA insertion mutant identification by PCR. LP and RP are mutant-specific gene primers, and LBb1.3 indicates the T-DNA left border primer.

(B) and (C) RT-PCR analysis of *DPBF3* and *DPBF4* expression in WT and *dpbf3/4* double mutant lines.



Fig. S9

*ADF1*

tatTTTTgtagttgttggtgttacacatcaatTTTTtacttcttaaagttgaatcaagttctcaaccaacaaactTTTTatcga  
atcaatggt**acgacg**aaattcaaaaatgttacttactaattttatagatagtttaaaaatataaattaaaattcagttattata  
taacaagaaaaatcagtggtattattgaaacacctacaaaataatgaatcaaaaacataaaattaattatagttattgaattcata  
attcaacaatattattgaaaattgaaatacataccaaaataataatgTTTT**tcgt**ctctataatggtggactcccgaataaa  
gtgagaagaaagagaaaagaaattgagaagaaaaagaaaaaaggtga**ccgt**attct**ccgt**cattgttagccgcc  
gaagaaatattctctctct**tcgt**taacc**acga**att**tgct**ctgatattagtttcttagccATGGTAAGCTCAA  
TTTTCCACTTGTATCTCGATCTgtagt**tgct**ctctcattttggt**tcgt**cttatacaaatctctgttt  
**acgc**gattctggctcattttgtttcgttagatctgtatacagattttggttttagatcttaagatttggtttatgtgat**cg**ttt  
gtgactgatttagaatcaaaact**tgcg**agagagcttctctgttgagttcactgtggctcttcgattcctctatctaaatttgaa  
atcagaagagtatt**acgg**cttctgttat**tgca**aaaaattcaagttatatcaatttcgataacatttggttggttgatccatta  
tccttgatgtttgattcatcagttcatgtaattgatacactctagaggttgagaacaatagaggttttgattgtgttatgtga  
aaagatttgaatatgagtggtttggttaacag

*ADF2*

gtttgaccattcattcttatgtttgttccaaagaaat**tgct**gtgtgaccacattgtatagcccaacatgaagtgtaccata  
tcatttaataaacacagatcatgattacactatttctaaactgtgaacttatccaccaagttatatcacctaaccatgacatttc  
aatataggttg**ggca**atcaataaaattcttatattgatgattaacagaaataaaaatttaactttgggaaatagtcttatccat  
attattataataaaccaaatgtatagaacatataacaaatgaaat**tgct**ttcattcatataattcggatagct**tgca**ataac  
**gct**gacaaaaaagaacagtgagaagaaaaaagaaggtcattttcatttctcatttgatttt**ggc**gaccggagaaa  
atatcttct**ggc**gtcttcttctcattcaccaggaactttattgaaat**cg**gtttgatttagccATGgtgagctcaatttctct  
gttctgttttaagttttcattttgaagcttctctcgaaaattcgatt**gcttgct**agtcgattcagttcaaat**ccgttgct**ct  
ctttggata**acg**attct**cgctcg**tttagatagatctggagatgattcagatactcagatctttgtagttgtagtgtgatcgg  
ttagagatccgattaagaact**cg**taactttgtgtt**tgct**cttcgtagcttatctgaaatcaggaagaat**tgct**gttttcac  
ttcaagttcaaatcaagtgttaaattct**acga**attttgacttttcatcagttgttcaattgttcgatctatgtt**tgcttctgct**  
cttgatgtgtcaaaattgaagtcaaaat**cg**ttctacaaagttgtgaggagctacttagcttcttctctgtgatgttaacaatgt  
agagatgatgataatattatccaatttctgtgtaagttgtgatctttgttttagaaaatgtgttttgaagagat**tgca**cttctca  
gtgtttgttatgtattgatatgataacag

*ADF3*

agaaaatcaagtattgttttcaaatcaagaaatcaaaagaagaattctgtattaagtttagttctcatggaagccatagaatat  
atcagaagttgaaacaaacagcaaatatatggaataaaaaacatagttattggaataaatagaatagttatTTTTTgttggc  
ataaaataaagaaaattattgttcaacaaattgttacagattcacttatgtatatttgaactaattctattttatattaattaaatc  
aagattttactttgaaaaataattaatgaatttatgaaacaatctctatgtaaataaaataaagcaaataaaacgctcacacatg  
ttacttattcggactagagagcttcgcataaagctgaggaaaaaaagagagaagacgcacaccgaagaaaacacaca  
agactcattattctctgcttcttcgtctctcaattattttctctgagactagctttgattcaaccATGgtgagctcaagctaa  
ttttctcttatatagttctctttttgttctctatggcttgattgaacttgccttctcgattcagttccattcttgattttcaa  
ttctccgatttaagttctcgcagagttagatatgattagatctgtagatggactcgttctttgttagatctctgagattttgga  
ttgtatggttagatggactgatctagatatgaatcggccgatagtaaagtctcaattcagtgctgtgtgtgttttagcca  
attgattttgaaaccaggaagaataatagttccatgtggtttctttgattttagggttacctatcgtttgttagcctttctt  
ttataagatattgtttctcgttctttgagttattttgctgctgtgaagtttcagatgtgtgtttgattctgttgatgtagat  
catccgattaatatgattcagaactgtaaatctgtcaaatgatattatgatagctcaacatcatcgttcataacgttggtgga  
gtcatccacgtcttccctttgatatacacactaccaagatctgtcatgattcattatgttgatctctgaactaatgtataaccga  
acgccgttttaaaagatgggtatagtgctactaatatgtgtattctgaagagagtgcacttaatgttctatgtttgttgtaac  
ag

*ADF4*

tgcgactatttcaggtcaaagtattaggaatttaggatagttccaataacgagaagagtgctcaatcagtttggccaataa  
gataaactgaccatcaaacataaaatcctaactgatactttgattatttgaaacagatccaaccattggcagttgtccattgct  
cattctacgaatctttcaactgtcaaatcttagcccaacaaaaatacttagatgattattatgttgacaaaacaataataa  
tgcctaccatagtttataattcataaataaattgaagaatacgaaattacgagaataaataaaaaatacaaaaagcaggt  
tcttcttatatattcgaatttagcttcaaataacgcagaagaaagtaagagagaagaagcaaaaagagtcattctgtg  
aaaacatcattcactcttcttgcgtctcctttcaccgaaattgtctctgacaccgttttgattcagccATGgtgatacta  
catttcacttcttctgttctttttgttatttcagttctcaattttaggctcgattctcgattttgcttctcgtctcggattttgaata  
acgattttggctcactagatctggatatggattgtttctccgatttagatctttgagattttgttgatgtgatcagagttagtg  
atccacttgcttcgtaagttagaatcgaatcatgaaggaatcgtcaattttgtgtgtgcttcgaagttcattaactattg  
aacgttctacgaccttattcgattgttgatccatcaggcttgtgtgtgtgaagtgcattgaagttcaaatcgtgctagag  
atgtattaacgagtttatgtgtgagctattctagtttagaggtttcaggaaatttcaagattcctaaataagagattcttgctttt  
agtattgtgtgattcaattataggctagctttgtggatctgggatgtgaatcttagcttctgtgttttattgaaatcag

*ADF6*

AGAAACTGCATctctgagacacgatggcacagtcaggtccgaacgttaagagtcgccggagttggagtgaac  
caccacaacagtaatcgccatagagccgtctaaaaacaaatcaaagagattatcttaacaacgacgtcgtttcttcgttccttt  
ctactctgaggcccaatgattttgttactattcactaatgggcttaattaaggcccaatattgatagatacgcggcgactagt  
taaggggcaacaaatgcccacttaaaaagaacacgactttcttatecggttgttctaaccgaccgaccgaacacttc  
ttttctctgcaataaaccaaaaaagftaaaaattcaaaaacttaattactaagcaaaagtgtgcacgaagaacaaagcgac  
gcatccgattttattgtttgataagttcgtgctcgtctctcttaaccaattctgtggtgtctgaagaaagcagaatcaat  
ccATGTCTTTCAGAGGACTTAGCAGGgtaaaattacaaaaaaaaacttttctctcttgcttaaaatcga  
tgtactctgtctatgtcgcaagcatcttcaatgttaaaaatttgattttatgaagtcgatgttaaaaaaactaaacccatccca  
ttttactcttattgagggttaagatcactagatgaagtcaattcgatgaattttggattaaaaatcgaatcttttggtatggtttg  
atatgtgtttggttttatctgtag

ADF9

Acacttaatatagtttaattggtgattttccaattctgaacatatatgatgataagtttccatccaagttgttttctcatta  
gtcactggaacattaattaccagcaatcagtagtactttggtattccccacacaaattcaatttaaaagaataattagtagt  
acttcttatgactgttttttactgaataaaaaagaactatatataggtgttcttaactataaccactaaaaaagggtctaaatt  
aattttaaaagaaaaatatagaagttaacttttatatattacacatcaaattccaatttcaggggctggaatttggaataatta  
aagaaactcaatggcaatgatttaagcacttctttatataagtccaccaaactacactgatctcctcaacaccacacacagcaa  
aacaaaaagctctctacactcaaaatataacgaagaacaagaagacatcatcttagctcactATGGCTTTGAAG  
ACGgtaacaatatacaaaactttcttattttccacttttgatttaatgaatctaaaagaaaatattttggatgattggtatag

Fig. S9. The prediction of ABRE core motif and GCEs in the ADFs promoter.

The prediction of ABRE core motif and GCEs in the ADFs promoter.

Fig. S10

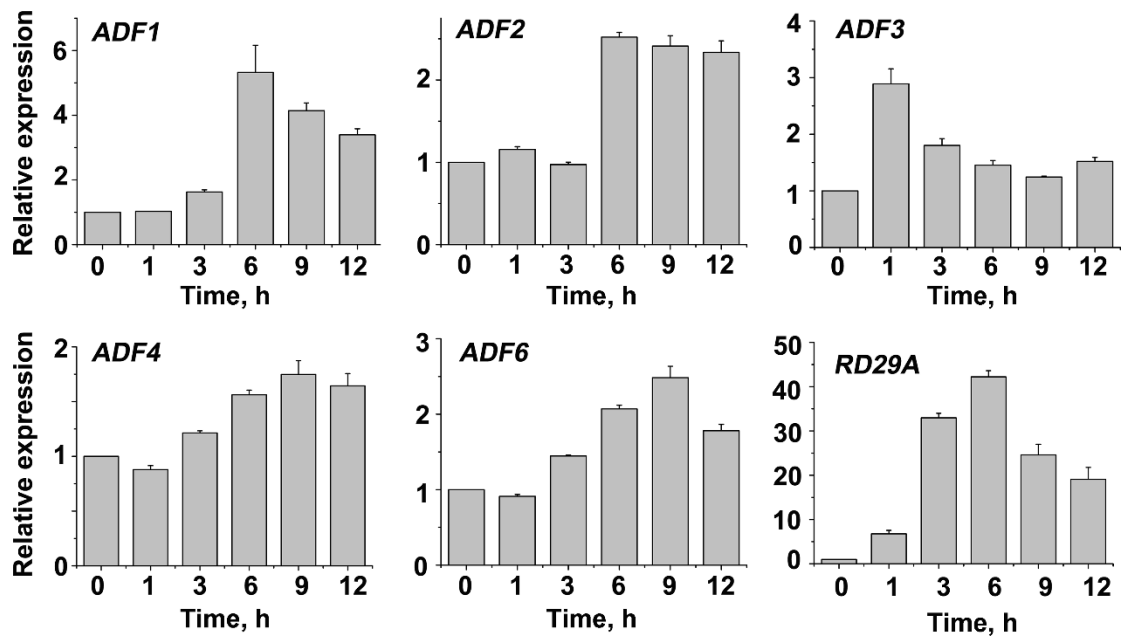

Fig. S10. The expression levels of *ADFs* induced by ABA.

qRT-PCR analysis was used to measure *ADF* (1/2/3/4/6) and *RD29A* expression by ABA. Fourteen-day-old seedlings were treated with 40  $\mu$ M ABA for different times, and the leaves of seedling were detached for RNA extraction. *UBQ11* was used as an internal gene.
